# Supplementary material for: Subphthalocyanine encapsulated within MIL-101(Cr)-NH2 as a solar light photoredox catalyst for dehalogenation of α-haloacetophenones
Source: Royal Society of Chemistry journal article supplement (doi:10.1039/c9dt04004h), 2019-01-01
Supplement: c9dt04004h1.pdf [file c9dt04004h1.pdf]

## **Subphthalocyanine encapsulated within in MIL-101(Cr)-NH<sub>2</sub> as solar light photoredox catalyst for dehalogenation of $\alpha$ -haloacetophenones**

Andrea Santiago-Portillo,<sup>a</sup> Sonia Remiro-Buenamañana,<sup>b</sup> Sergio Navalón,<sup>a</sup>

Hermenegildo García<sup>a,b,c,\*</sup>

<sup>a</sup> Departamento de Química, Universitat Politècnica de València, C/Camino de Vera s/n, 46022 Valencia, Spain.

<sup>b</sup> Instituto Universitario de Tecnología Química, CSIC-UPV, Universitat Politècnica de València, Av. de los Naranjos, Valencia 46022, Spain

<sup>c</sup> Center of Excellence for Advanced Materials Research, King Abdulaziz University, Jeddah, Saudi Arabia

**Supporting Information**

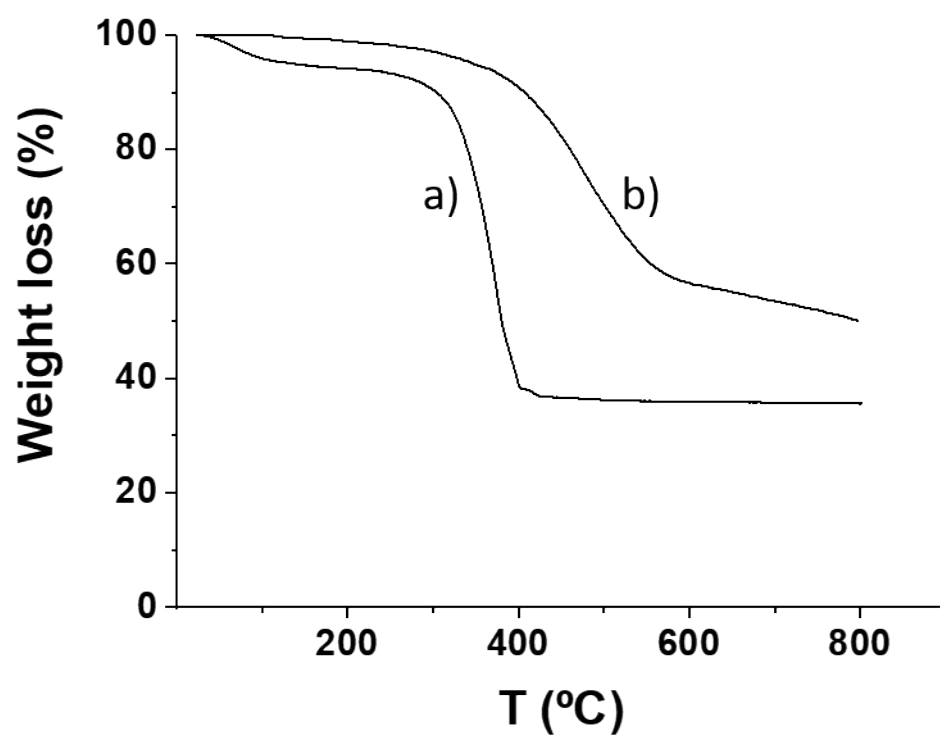

**Figure S1.** Thermogravimetric profile of a) MIL-101(Cr)-NH<sub>2</sub> and b) SubPc@MIL-101(Cr)-NH<sub>2</sub>.

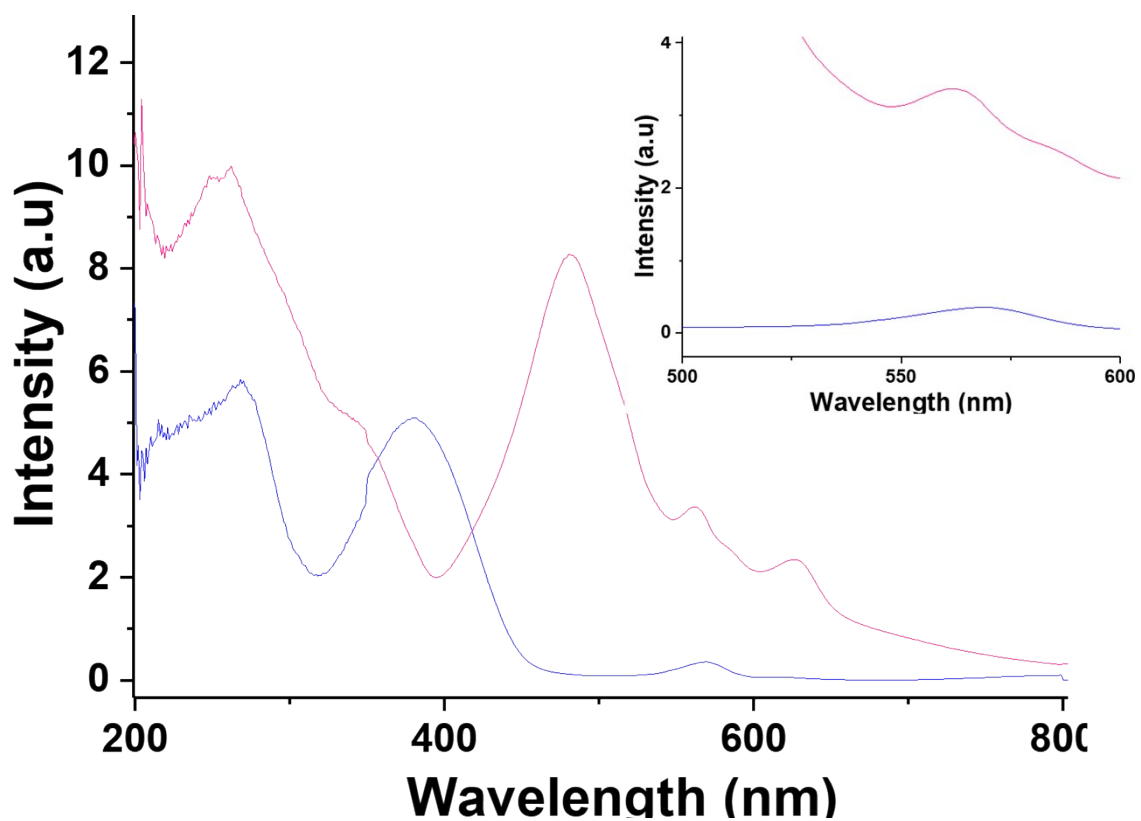

**Figure S2.** Diffuse reflectance UV-Vis spectra of SubPc-Cl (pink line) and SubPc@MIL-101(Cr)-NH<sub>2</sub> (blue line). The inset shows an expansion of the 600-800 nm region.

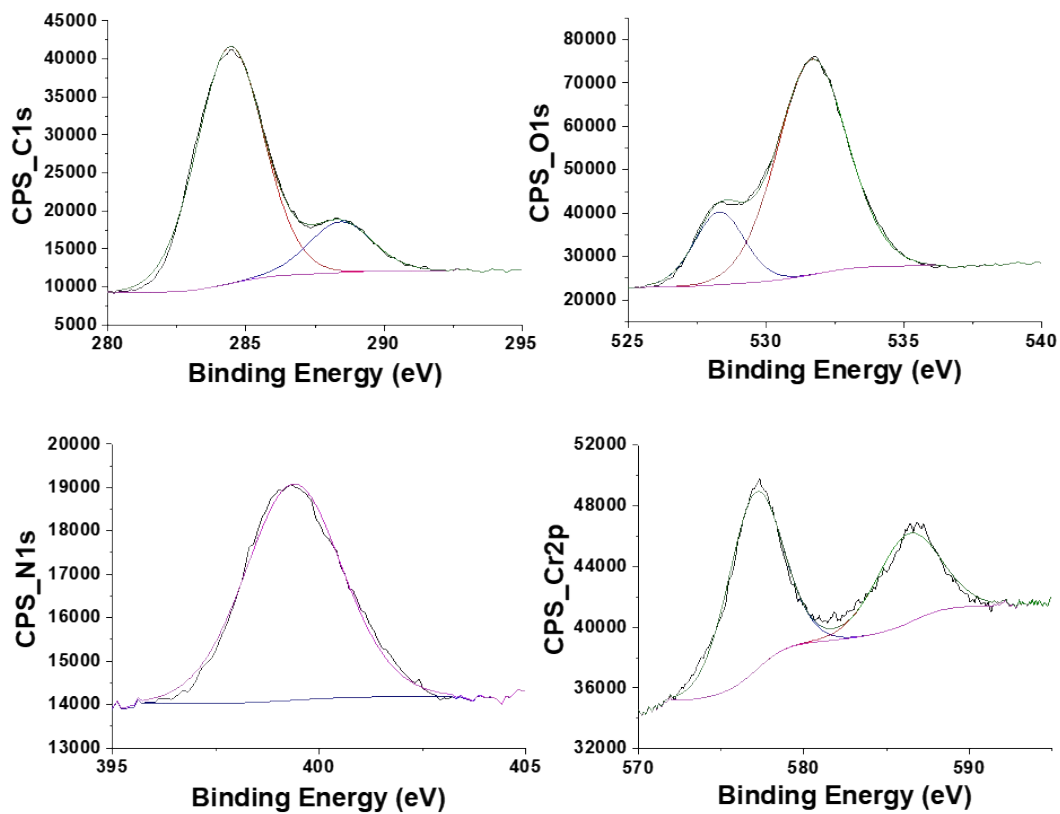

Figure S3. XP spectra of MIL-101(Cr)-NH<sub>2</sub>.

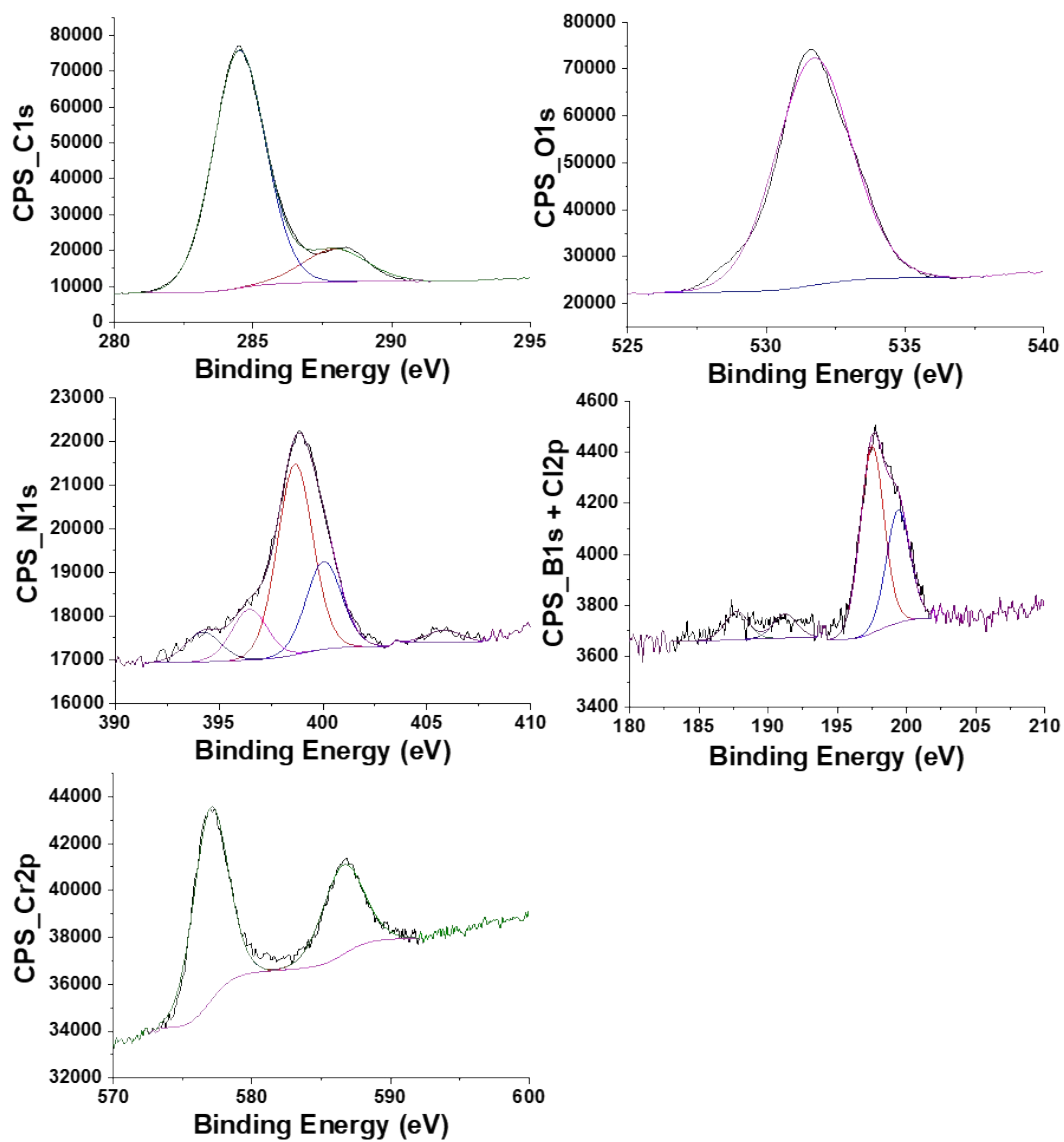

Figure S4. XP spectra of SubPc@MIL-101(Cr)-NH<sub>2</sub>.

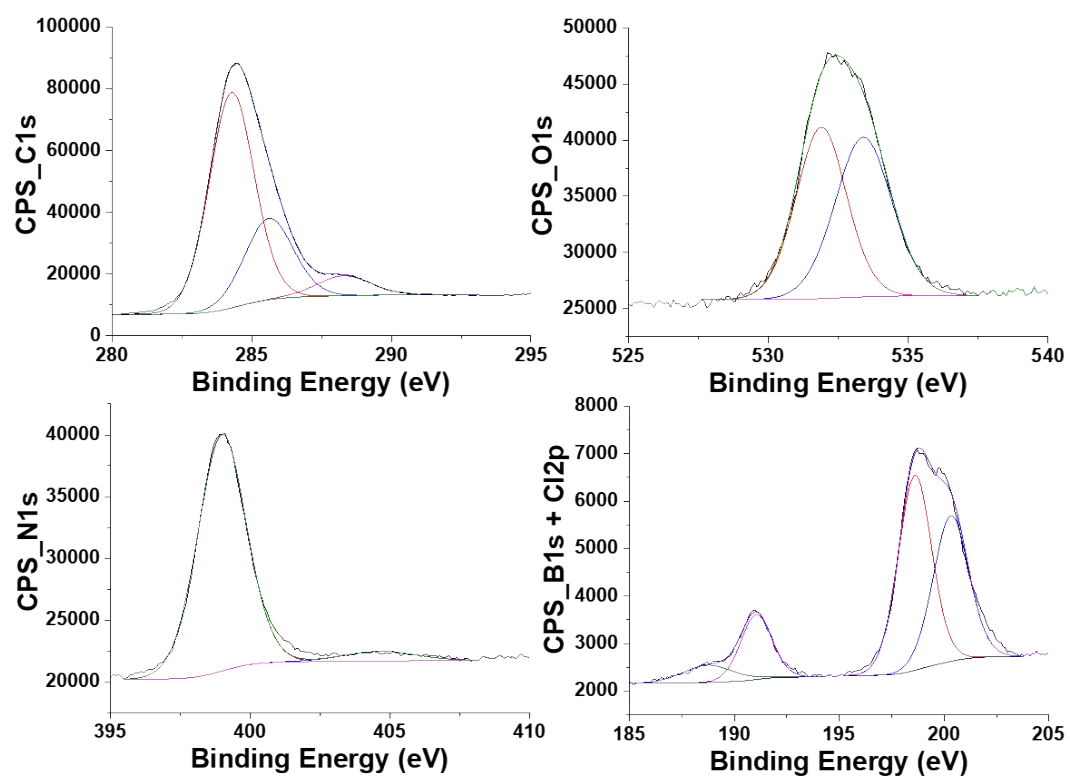

Figure S5. XP spectra SubPc-Cl.

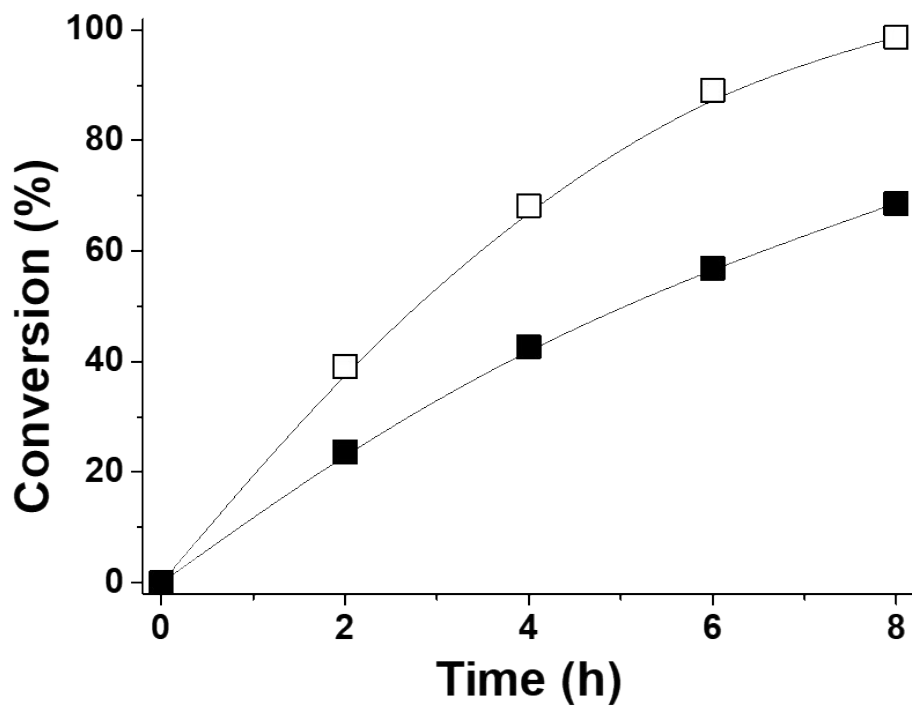

**Figure S6.** Time-conversion plot of the hydrogenative dehalogenation using SubPc@MIL-101(Cr)-NH<sub>2</sub> as catalyst. Legend: (■)  $\alpha$ -chloroacetophenone and (□)  $\alpha$ -bromoacetophenone. Reaction conditions:  $\alpha$ -halogenacetophenone (1 mmol), TEOA (10  $\mu$ L), CH<sub>3</sub>CN (3 mL) and MOF (10 mg).

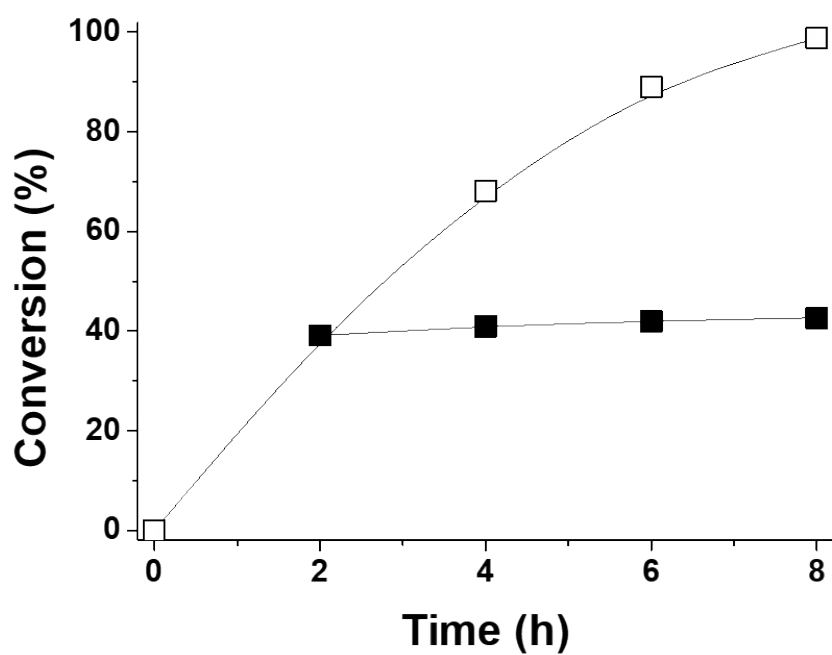

**Figure S7.** Time-conversion plot for the hydrogenative debromination using SubPc@MIL-101(Cr)-NH<sub>2</sub> as catalyst. Legend: (■) in the presence of 20 % TEMPO added at 2 h reaction and (□) in the absence of TEMPO. Reaction conditions:  $\alpha$ -bromocetophenone (1 mmol), TEOA (10  $\mu$ L), CH<sub>3</sub>CN (3 mL) and MOF (10 mg).
